# Supplementary figures and images for: Evaluation and Comparison of Multi-Omics Data Integration Methods for Subtyping of Cutaneous Melanoma
Source: MDPI journal article supplement (doi:10.3390/biomedicines10123240), 2022-12-13

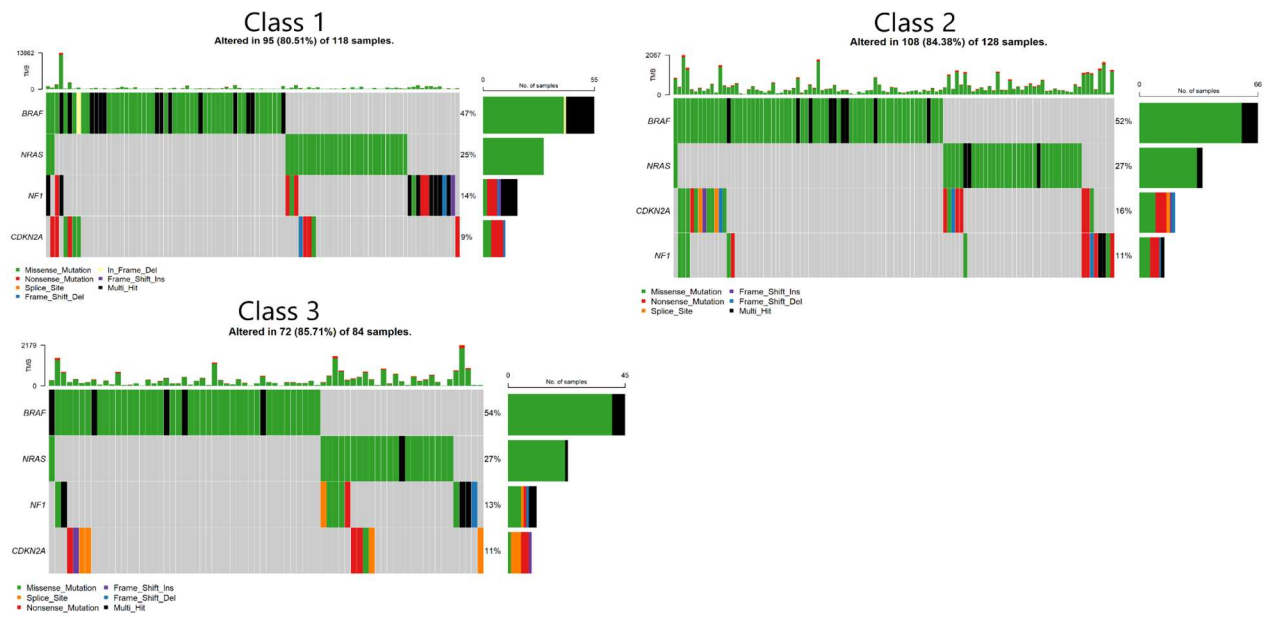

**Figure S1:** variant distribution in JSVD classes.

Supplement: s1 [file s1]
